1 Prediction of *Burkholderia pseudomallei*  
2 DsbA substrates identifies potential  
3 virulence factors and vaccine targets  
4

5  
6 Vezina, Ben<sup>1\*</sup>, Petit, Guillaume A.<sup>1\*</sup>, Martin, Jennifer L.<sup>1,2</sup>, Halili, Maria A.<sup>1+</sup>

7  
8 <sup>1</sup>Griffith institute for Drug Discovery, Griffith University, Building N75, 46 Don Young Rd,  
9 Nathan, QLD 4111, Australia

10 <sup>2</sup>Vice-Chancellor's Unit, University of Wollongong, Northfields Avenue, Wollongong, NSW  
11 2500 Australia

12  
13 +Corresponding author Email: [m.greenup@griffith.edu.au](mailto:m.greenup@griffith.edu.au)

14  
15 \*These authors contributed equally  
16  
17

## 18 **Abstract**

19 Identification of bacterial virulence factors is critical for understanding disease pathogenesis,  
20 drug discovery and vaccine development. In this study we used two approaches to predict  
21 virulence factors of *Burkholderia pseudomallei*, the Gram-negative bacterium that causes  
22 melioidosis. *B. pseudomallei* is naturally antibiotic resistant and there are no melioidosis  
23 vaccines. To identify *B. pseudomallei* protein targets for drug discovery and vaccine  
24 development, we chose to search for substrates of the *B. pseudomallei* periplasmic disulfide  
25 bond forming protein A (DsbA). DsbA introduces disulfide bonds into extra-cytoplasmic  
26 proteins and is essential for virulence in many Gram-negative organism, including *B.*  
27 *pseudomallei*. The first approach to identify *B. pseudomallei* DsbA virulence factor substrates  
28 was a large-scale genomic analysis of 511 unique *B. pseudomallei* disease-associated strains.  
29 This yielded 4,496 core gene products, of which we hypothesise 263 are DsbA substrates.  
30 Manual curation of the 263 mature proteins yielded 73 associated with disease pathogenesis or  
31 virulence. These were screened for structural homologues to predict potential B-cell epitopes.  
32 In the second approach, we searched the *B. pseudomallei* genome for homologues of the more  
33 than 90 known DsbA substrates in other bacteria. Using this approach, we identified 15  
34 potential *B. pseudomallei* DsbA virulence factor substrates. Two putative *B. pseudomallei*  
35 virulence factors were identified by both methods: homologues of PenI family  $\beta$ -lactamase and  
36 of succinate dehydrogenase flavoprotein subunit. These two proteins could serve as high  
37 priority targets for future *B. pseudomallei* virulence factor characterization.

38

## 39 **Introduction**

40 *Burkholderia pseudomallei* is a Gram-negative soil dwelling saprophyte, and an opportunistic  
41 pathogen responsible for the severe tropical disease melioidosis [1]. *B. pseudomallei* infections  
42 are difficult to treat [2-4] and are intrinsically resistant to almost all available antibiotics [5-8].  
43 Predominant resistance factors utilised by *B. pseudomallei* include a thick, impermeable cell  
44 wall combined with efficient efflux pumps that interfere with drug activity [9]. Furthermore,  
45 *B. pseudomallei* infections are difficult to diagnose as melioidosis symptoms vary significantly,  
46 ranging from fever, pneumonia, urinary tract infections, and on rare occasions  
47 encephalomyelitis [4]. Standard treatment consists of a combination of intravenous antibiotic  
48 for two weeks to stop septicaemia, followed by a second eradication phase that can last for up  
49 to six months, with no guarantee of success [10].

50  
51 More generally, antibiotic resistance is increasing at an accelerating rate among pathogenic  
52 bacteria [11]. New approaches and treatment strategies are needed including vaccination [12],  
53 novel antimicrobial compounds [13] and antivirulence strategies [14]. There is currently no  
54 successful, persistent vaccine against *B. pseudomallei* [15]. However Outer Membrane Protein  
55 A (OmpA) has been used as a subunit vaccination against melioidosis in mice [16].

56  
57 Identification of *B. pseudomallei* virulence factors would contribute towards understanding  
58 pathogenesis and could aid in drug discovery and vaccine development [17]. Targeting  
59 virulence rather than viability is an approach that is hypothesized to have a number of benefits  
60 including an increased range of possible anti-virulence mechanisms compared to antimicrobial  
61 compounds, as well as the possibility of reducing selection pressure [18, 19]. Both vaccine  
62 development and anti-virulence approaches could reduce selection pressure and potentially  
63 reduce resistance development [14, 18, 19].

64

65 The formation of correct disulfide bonds is critical for the proper folding and function of  
66 proteins [20]. In bacteria, the introduction of disulfide bonds is mediated by the Disulfide Bond-  
67 forming proteins (Dsb). The Dsb proteins are of particular interest as an antivirulence  
68 strategy, because many virulence factors contain disulfide bonds [19, 21-23]. The Disulfide  
69 bond forming protein A (DsbA) is a periplasmic protein found in most Gram-negative bacteria  
70 and incorporates a thioredoxin fold with two cysteines which introduce disulfide bonds into  
71 substrate proteins via a redox transfer reaction [24].

72

73 Mice infected with *B. pseudomallei* DsbA knockouts (or of its redox partner DsbB) have an  
74 increased rate of survival compared with mice infected with wild type *B. pseudomallei* [25,  
75 26]. These findings suggest that many *B. pseudomallei* virulence factors are substrates of  
76 DsbA, as is also observed in *Escherichia coli* [27, 28], *Klebsiella pneumoniae* [29], *Salmonella*  
77 *enterica* [30], *Francisella tularensis* [31] and many more [22, 23, 32]. However, the full extent  
78 of *B. pseudomallei* DsbA substrates has not been investigated. Identification of *B. pseudomallei*  
79 DsbA substrates would help identification of infection mechanisms, and could lead to the  
80 discovery of key virulence factors and potential drug and vaccine targets. Finding potential  
81 DsbA substrates is assisted by the observation that: (i) DsbA is located in the periplasm, and  
82 thus its substrates are likely to have a secretion signal sequence; and (ii) proteins containing  
83 disulfide bonds may have an even rather than an odd number of cysteines in their sequence.  
84 This last point is thought to have evolved to limit formation of mis-matched disulfide bonds  
85 and therefore misfolded proteins [33, 34].

86

87 In the present study, we used two approaches to identify potential *B. pseudomallei* DsbA  
88 substrates for further study as virulence factors. In one approach, we used computational

89 methods to generate a curated list of 263 putatively extra-cytoplasmic proteins from the core  
90 genome of 511 disease-associated isolates of *B. pseudomallei*, 73 of which were predicted to  
91 be virulence-associated. In the second approach, 15 candidate DsbA virulence factor substrates  
92 were identified by sequence homology to known DsbA virulence factor substrates in other  
93 bacteria.  
94

## 95 Results

### 96 Genomic analysis to predict *B. pseudomallei* DsbA virulence factor 97 substrates

98 In this approach, our strategy was to cast a wide net initially, by determining the pangenome  
99 of disease-associated isolates of *B. pseudomallei*, and then filtering from that the core genome  
100 (i.e. the highly conserved genes). The disease-associated *B. pseudomallei* core genome should  
101 then be enriched in conserved virulence factors. At the time of this analysis the NCBI database  
102 [35] contained 1577 *B. pseudomallei* isolates. Metadata notation allowed selection of 512  
103 isolates associated with disease (i.e. isolates from swabs/clinical isolates: accession numbers  
104 of these are given in S1 Fig); other genomes were discarded. We note that only 355 of the 512  
105 isolates were tagged ‘pathogen’ in the NCBI database indicating a discrepancy between NCBI  
106 assignment and user-uploaded metadata. Analysis of the pangenome, that is the core, accessory  
107 and unique genes of these 512 *B. pseudomallei* isolates (see Table 1), revealed two identical  
108 strains. Therefore for the remainder of this analysis, only the 511 unique strains were used.

109

110 **Table 1: Pangenome results of 511 disease-associated *B. pseudomallei* strains.**

| Pangenome breakdown | Classification           | Number of genes | Percent of pangenome (%) |
|---------------------|--------------------------|-----------------|--------------------------|
| Core genes          | (99% <= strains <= 100%) | 4,496           | 22.49                    |
| Soft core genes     | (95% <= strains < 99%)   | 517             | 2.59                     |
| Shell genes         | (15% <= strains < 95%)   | 965             | 4.83                     |
| Cloud genes         | (0% <= strains < 15%)    | 14,013          | 70.10                    |
| Total pangenome     | (0% <= strains <= 100%)  | 19,991          | 100                      |

111 The pangenome is subdivided into the core (found in every strain), soft shell core (found in 95  
112 – 99% of strains), shell (found in 15 – 95% of strains), and cloud (found in 0 – 15% of strains)  
113 genes. The total number of genes is shown, along with the percentage of total pangenome.

114

115 We found that the core genome consisted of 4,496 genes (see S2 Fig) or 22.49% of the total  
116 19,991 pangenome. This analysis largely agrees with a previous pangenomic analysis which

117 extrapolated a modelled core genome of  $4,568 \pm 16$  from a much smaller set of 37 isolate  
118 genomes [36]. In that approach, modelling was used to predict the core genome if the number  
119 of isolates was expanded. Our approach gives an exact number because all 4,496 genes were  
120 found in all 511 genomes. Notably, the dithiol oxidase redox enzyme pair DsbA and DsbB and  
121 the disulfide isomerase redox relay enzymes DsbC and DsbD were all identified as core genes.

122

123 We then used the *B. pseudomallei* core genome for further analysis, because it encodes highly  
124 conserved proteins - a key criteria for selecting vaccine or anti-virulence targets.

125

126 From these 4,496 core genes, 726 were predicted to encode proteins with a signal sequence  
127 and which are therefore likely to be exported out of the cytoplasm and into the periplasm where  
128 DsbA is localised. Of these 726 proteins, 263 have an even number of cysteines, indicating the  
129 likelihood that the proteins form intramolecular disulfide bonds (see S3 Fig). We predict that  
130 these 263 proteins are substrates of *B. pseudomallei* DsbA. The workflow for this analysis is  
131 shown in Fig 1.

132

133 **Fig 1: Bioinformatic workflow.** From the 1,577 *B. pseudomallei* genomes found on NCBI,  
134 511 were unique and associated with disease and these were used for further analysis. The  
135 pangenome of these 511 genomes comprised 19,991 unique genes. 4,496 of these were  
136 classified as core genes. Predicted translation of these genes gave 726 predicted extra-  
137 cytoplasmic proteins. Of these extra-cytoplasmic proteins, 263 were predicted to contain an  
138 even number of cysteines. We predict that these 263 proteins are substrates of *B.*  
139 *pseudomallei* DsbA.

140

## 141 **Distribution of cysteines in the core genome of disease-related *B.*** 142 ***pseudomallei***

143 Many bacterial extra-cytoplasmic (periplasmic and extracellular) proteins have a strong  
144 preference for an even number of cysteines, which is thought to reduce the chances of non-

145 native disulfide bond formation [33]. We examined the cysteine distribution of encoded  
146 proteins in the *B. pseudomallei* pangenome to investigate whether the previously demonstrated  
147 enrichment of an even number of cysteines in extra-cytoplasmic proteins in other Gram-  
148 negative bacteria [33] was also true for *B. pseudomallei*.

149

150 The distribution of cysteines in *B. pseudomallei* cytoplasmic and extra-cytoplasmic proteins  
151 was calculated for the pangenome (total of 19,991 genes) and the core genome (4,496 genes)  
152 (refer to Table 1). In cytoplasmic *B. pseudomallei* proteins, cysteine distribution followed a  
153 Poisson law peaking at zero for the pangenome and at one for the core genome (denoted by the  
154 orange lines in the histograms on Figs 2A and 2B). This distribution changed for extra-  
155 cytoplasmic *B. pseudomallei* proteins. For the core genome (blue bars Fig 2B), *B. pseudomallei*  
156 proteins with an even number of cysteines were over-represented compared to a typical Poisson  
157 distribution. As extra-cytoplasmic proteins represent a small fraction of the total number of the  
158 translated core genome and pangenome (16% and 11.5% of all proteins, respectively), we also  
159 analysed the normalised frequency (Figs 2C and 2D). The core genome normalised cysteine  
160 distribution reveals a sawtooth pattern with a preference for even number of cysteines with  
161 peaks for two, four, six and eight cysteines (Fig 2D). In contrast, the pangenomic normalised  
162 cysteine distribution for extra-cytoplasmic *B. pseudomallei* proteins does not indicate a strong  
163 preference for even number of cysteines (Fig 2C). Overall, the saw-tooth pattern observed in  
164 Figs 2B and 2D is similar to that described for *E. coli* exported proteins [33] although not as  
165 pronounced.

166

167 **Fig 2: Cysteine distribution in the translated genome of *B. pseudomallei*.** Panel **A** shows  
168 the distribution of cysteines in the pangenome (19,991 proteins). Panel **B** represents the same  
169 analysis for the core genome, comprising 4,496 translated genes. Predicted number of extra-  
170 cytoplasmic proteins for each number of cysteines are represented as blue bars. Similarly,  
171 predicted cytoplasmic proteins are represented as orange lines. Panels **C** and **D** represent the  
172 normalised frequency of cysteine-containing extra-cytoplasmic proteins. The blue line in panel



173 **D** peaks for proteins with 2, 4, 6 and 8 cysteines suggesting a preference for an even number  
174 of cysteines. This trend is not observed as strongly in panel **C**, where a clear peak can only be  
175 seen for two and eight cysteines. The normalised frequency was calculated by dividing the  
176 number of extra-cytoplasmic proteins (having  $N$  number of cysteines) by the total number of  
177 proteins with  $N$  cysteines ( $N$  being a number between 0 - 20 as per the data points in **C** and **D**  
178 above).

179

## 180 **Functional assignment of core, extra-cytoplasmic, putative DsbA** 181 **substrates**

182 The next step in the genomic analysis was to predict which of the 263 putative DsbA substrates  
183 are associated with virulence. Of the 263 selected proteins, 44 were annotated as  
184 hypothetical/uncharacterised. The remaining 219 proteins include ABC transporter-related  
185 proteins, housekeeping proteins like cytochrome C, proteins required for motility such as  
186 flagellar and fimbrial proteins, enzymes such as collagenase, peptidases and proteases, as well  
187 as antibiotic resistance enzymes,  $\beta$ -lactamases. Many oxidoreductases were also present  
188 including DsbA, DsbD and others such as Gfo/Idh/MocA family, glycerol-3-phosphate  
189 dehydrogenase GpsA and thioredoxin-like TlpA oxidoreductases. Redox enzymes such as  
190 DsbB and DsbC are core genes with signal sequences, and they have catalytic rather than  
191 structural disulfides. These two enzymes are not identified as DsbA substrates in our filter as  
192 they have an odd number of cysteines.

193

194 Gene Ontology (GO) classification of the gene and gene-product function of the 263 proteins  
195 reveals a variety of functions, totalling 223 GO descriptions (Fig 3) (see S4 File for a full list).  
196 The highest frequency are integral components of the membrane (66 proteins), followed by  
197 proteins involved in redox processes (25 proteins). Of particular interest due to their putative  
198 involvement in virulence, are proteins associated with: proteolysis (20), heme binding (15),  
199 hydrolase activity (9), carbohydrate metabolism (8), serine-type endopeptidase activity (7), cell

200 adhesion (6), metallo-endopeptidase activity (6), pilus formation and organisation (6), copper  
 201 binding (5), lipid catabolism (4), choline binding (3), triglyceride lipase activity (3),  
 202 aminopeptidase activity (2), porin activity (OmpA family proteins) (2), chitin catabolism (1),  
 203 *N*-carbamoylputrescine amidase activity (1) and toxin activity (Tat pathway signal protein) (1).  
 204

205 **Fig 3: Gene Ontology (GO) descriptions of predicted extra-cytoplasmic proteins with an**  
 206 **even number of cysteines.** The highest frequency of proteins with an even number of  
 207 cysteines are integral components of membranes (66 proteins), followed by proteins involved  
 208 in redox (oxidation-reduction) processes (25 proteins) and proteolysis (20 proteins). For ease  
 209 of representation and clarity, GO descriptors with less than three counts were excluded from  
 210 this graph. A complete graph, along with raw values can be found in S4 File.

211  
 212 By further inspection of the 263 core, putatively extra-cytoplasmic DsbA substrates, and by  
 213 using the GO descriptions to aid in predicting protein functions, 73 sequences were identified  
 214 which were virulence-associated (Table 2). These include serine-type endopeptidases [37]  
 215 associated with adherence, choline binding proteins *N*-carbamoylputrescine amidase, essential  
 216 for production of putrescine, a component of Gram-negative cell walls of pathogens and key  
 217 virulence [39-42], many proteases and peptidases.

218  
 219 **Table 2: Predicted virulence-associated core, extra-cytoplasmic proteins.**

| Virulence-associated GO description                       | Accession numbers                                                                                  |
|-----------------------------------------------------------|----------------------------------------------------------------------------------------------------|
| Aminopeptidase activity                                   | ABA50277.1; WP_053292838.1                                                                         |
| Bacterial-type flagellum assembly                         | WP_004525898.1                                                                                     |
| Beta-lactamase activity                                   | KGV04506.1                                                                                         |
| Carbohydrate metabolic processes                          | ABA52198.1; EDO83218.1; EEH25224.1; WP_004526045.1; WP_004526830.1; WP_004553625.1; WP_053293009.1 |
| Cell adhesion/lipid metabolic/catabolic process/chitinase | WP_004193933.1                                                                                     |
| Cell adhesion/pilus                                       | EDU07436.1; WP_004193385.1; WP_038760383.1; WP_038765499.1; WP_063597677.1                         |
| Chitin catabolic process                                  | WP_076802983.1                                                                                     |
| Choline binding and transport                             | ABA51731.1; ABN86005.1; ABN92885.1                                                                 |
| Copper ion binding                                        | WP_004529973.1; WP_004546221.1                                                                     |

|                                                     |                                                                                                                                                                                |
|-----------------------------------------------------|--------------------------------------------------------------------------------------------------------------------------------------------------------------------------------|
| Heme binding                                        | WP_004194773.1; WP_004535805.1; WP_004536717.1; WP_004538457.1; WP_004538458.1; WP_038730764.1; WP_041189005.1; WP_043304483.1; WP_076903047.1; WP_139900217.1; WP_151277731.1 |
| Heme binding/copper ion binding                     | WP_029671417.1; WP_122827599.1                                                                                                                                                 |
| Heme binding/proteolysis                            | WP_009981622.1                                                                                                                                                                 |
| Heme bindingcopper ion binding                      | WP_080248664.1                                                                                                                                                                 |
| Hydrolase activity                                  | CFL10512.1; EEC34719.1; WP_004525656.1; WP_024428578.1; WP_024429096.1; WP_080300428.1                                                                                         |
| Lipid metabolic/catabolic process                   | WP_009956690.1; WP_080248725.1                                                                                                                                                 |
| Metallopeptidase/metalloendopeptidase activity      | AFR18870.1; WP_004548157.1; WP_011204325.1; WP_038708181.1; WP_038730428.1; WP_076887541.1                                                                                     |
| N-carbamoylputrescine amidase activity              | WP_045597613.1                                                                                                                                                                 |
| Penicillin binding/beta-lactamase activity          | EDO89205.1                                                                                                                                                                     |
| Pilus and pilus organisation                        | WP_151269450.1                                                                                                                                                                 |
| Porin activity                                      | WP_004189892.1; WP_011205039.1                                                                                                                                                 |
| Proteolysis/hydrolase activity                      | WP_011204795.1; WP_076852667.1                                                                                                                                                 |
| Serine-type endopeptidase/carboxypeptidase activity | ABA50268.1; ACQ98979.1; AFR20596.1; WP_004528537.1; WP_004529035.1; WP_004553586.1; WP_011852052.1; WP_024428782.1; WP_038778478.1                                             |
| Toxin activity                                      | WP_038707916.1                                                                                                                                                                 |
| Triglyceride lipase activity                        | EEH28759.1; WP_038741497.1; WP_038775093.1                                                                                                                                     |
| Xenobiotic transmembrane transporter activity       | WP_004534049.1                                                                                                                                                                 |

220 Analysis of the 263 putative DsbA substrates revealed 73 proteins associated with virulence,  
221 based on GO descriptions. Accession numbers from *B. pseudomallei* are shown, separated by  
222 a semicolon.  
223

## 224 **Sequence homology prediction of *B. pseudomallei* DsbA virulence**

### 225 **factor substrates**

226 To complement the genomic analysis described above we used a second approach to identify  
227 DsbA substrates, by screening all *B. pseudomallei* genomes uploaded on NCBI [43] (taxid  
228 28450) for homologues of known DsbA substrates. We implemented this approach because  
229 some DsbA substrates might be filtered out using the genomic approach described above if the  
230 substrates are not encoded by core genes, or if the gene product has an odd number of cysteines.  
231

232 Over 90 DsbA substrates have been reported in the literature. We searched for *B. pseudomallei*  
 233 homologues of these DsbA substrates using the following criteria: (i) presence of secretion  
 234 signal, (ii) at least two cysteines in the mature sequence, (iii) at least 20% identity and (iv) 50%  
 235 coverage to a known DsbA substrate sequence. After removing duplicates, our analysis found  
 236 that *B. pseudomallei* encodes homologues of 15 DsbA substrates (Table 3). Two of these 15  
 237 are DsbA substrates in other *Burkholderia* species *B. cepacia* and *B. cenocepacia* [44-47]: a  
 238 metalloprotease, ZmpA and a sulfatase-like hydrolase transferase. In *B. cenocepacia*, ZmpA  
 239 is a wide spectrum metalloprotease, thought to cause tissue damage during infection [48].

240

241 **Table 3: List of *B. pseudomallei* proteins homologous to previously reported DsbA**  
 242 **substrates.**

| Accession Number (DsbA substrate) | Organism                     | Reference | <i>B. pseudomallei</i> homologue | Identity / coverage (%) | Protein function                                    | Cys # |
|-----------------------------------|------------------------------|-----------|----------------------------------|-------------------------|-----------------------------------------------------|-------|
| WP_059237834                      | <i>B. cepacia</i>            | [44]      | WP_076835606.1                   | 89 /100                 | Sulfatase like hydrolase /transferase               | 3     |
| WP_006481898                      | <i>B. cenocepacia</i>        | [45, 46]  | WP_139900467                     | 87/100                  | M4 family metallopeptidase                          | 4     |
| gi 89255876                       | <i>F. tularensis</i>         | [34]      | WP_050859308                     | 24/92                   | lytic transglycosylase                              | 3     |
| gi 89255615                       | <i>F. tularensis</i>         | [34]      | WP_080367462                     | 40/51                   | Pilin                                               | 2     |
| gi 89255615                       | <i>F. tularensis</i>         | [34]      | WP_076953316                     | 27/92                   | Pilin                                               | 2     |
| gi 89256194                       | <i>F. tularensis</i>         | [34]      | WP_041862011                     | 30/83                   | Molybdopterin synthase adenyl transferase (MoeB)    | 13    |
| gi 89256236                       | <i>F. tularensis</i>         | [34]      | WP_064459078                     | 34/53                   | DNA/RNA endonuclease                                | 2     |
| gi 89256237                       | <i>F. tularensis</i>         | [34]      | WP_050772403                     | 31/90                   | PenI family Beta-lactamase                          | 4     |
| gi 89256856                       | <i>F. tularensis</i>         | [34]      | WP_044360358                     | 21/80                   | hypothetical protein                                | 4     |
| gi 89256859                       | <i>F. tularensis</i>         | [34]      | WP_058035453                     | 39/80                   | Polyamine ABC transporter substrate binding protein | 3     |
| gi 89257049                       | <i>F. tularensis</i>         | [34]      | WP_009915682                     | 54/99                   | Succinate dehydrogenase                             | 6     |
| WP_001363619                      | <i>E. coli</i>               | [22]      | WP_102811167                     | 38/88                   | Molecular chaperone                                 | 3     |
| AAC38377                          | <i>E. coli</i>               | [22]      | WP_082252625                     | 44/93                   | T3SS outer membrane ring protein                    | 4     |
| AAA24962                          | <i>Haemophilus Influenza</i> | [22]      | WP_053293022                     | 47/92                   | ABC transporter substrate binding protein           | 4     |
| CAA43967                          | <i>Yersinia pestis</i>       | [22]      | WP_085538626                     | 32/83                   | Pilus assembly protein PapD                         | 2     |

243 The accession number of the known DsbA substrate (in an organism other than *B.*  
244 *pseudomallei*), the organism and the publication reference are given in the first three columns.  
245 The corresponding *B. pseudomallei* homologue is given in the fourth column. The identity and  
246 coverage (number of residues in the result sequence that overlap with the search sequence) is  
247 given in percent in the column “identity/coverage”. The final two columns provide the protein  
248 function and the number of cysteines in the predicted mature sequence. All proteins in this  
249 table are known or predicted to be secreted or periplasmic.

250

251 Over 50 DsbA substrates in *Francisella tularensis* were identified by trapping and co-purifying  
252 substrates bound to a DsbA variant [34]. Of these 50, we found nine homologues encoded in  
253 *B. pseudomallei* (see Table 3). These include homologues of the lytic transglycosylase domain  
254 containing protein (implicated in peptidoglycan rearrangement) and homologues of two pilin  
255 proteins involved in the formation of pilus and flagella. Also present is an MoeB homologue;  
256 MoeB is a molybdopterin synthase adenyl transferase (cytoplasmic in *E. coli* but likely  
257 periplasmic in *B. pseudomallei* due to the twin-arginine translocation (TAT) signal sequence).  
258 A PenI family  $\beta$ -lactamase homologue is also found in *B. pseudomallei*; this is a class A  $\beta$ -  
259 lactamase that confers resistance to  $\beta$ -lactams including, in rare cases, ceftazidime (commonly  
260 used to treat melioidosis) [49]. A succinate dehydrogenase flavoprotein subunit homologue,  
261 found in the bacterial inner membrane and part of the electron transport chain, is also encoded  
262 in *B. pseudomallei*. This protein is cytoplasmically oriented in *E. coli*, though again the *B.*  
263 *pseudomallei* version has a TAT signal sequence suggesting a possible periplasmic  
264 localisation.

265

266 A number of DsbA substrates identified in *E. coli* (reviewed in [22]) have *B. pseudomallei*  
267 homologues including a molecular chaperone homologous to PapD and EscC, involved in the  
268 formation of the Type III secretion system (T3SS). The T3SS assembly requires DsbA activity  
269 in many Gram-negative bacteria, including *E. coli* and *S. typhimurium*. [50, 51]. Finally, a *B.*

270 *pseudomallei* protein homologous to the *Y. pestis* pilus assembly protein Caf1M (a molecular  
271 chaperone involved with assembly of the surface capsule of the bacterium) was also identified.

272

273 Of the 15 putative *B. pseudomallei* DsbA substrates identified using this substrate homology  
274 method, two were also identified in the genomic pipeline method. These are the PenI and  
275 succinate dehydrogenase flavoprotein subunit homologues.

276

277 We then aligned the sequences of the Table 3 *B. pseudomallei* proteins to identify any possible  
278 sequence conservation around the cysteine residues, but no pattern was identified. This lack of  
279 peptide sequence motif in DsbA substrates has also been observed in *E.coli*, demonstrating the  
280 difficulty of DsbA substrate prediction [52].

281

## 282 **Epitope prediction of virulence-associated proteins**

283 To determine whether the DsbA substrates identified in the two methods above could  
284 contribute to vaccination efforts against *B. pseudomallei*, we also predicted B-cell epitopes,  
285 using a structure-informed approach. The sequences of the 73 putative, extra-cytoplasmic  
286 DsbA substrates (predicted virulence factors, Table 2) along with the 15 homologous DsbA  
287 substrates (Table 3) were screened against the Protein Data Bank (PDB) [53], to identify  
288 structurally characterised homologues (see S6 File). Six of the 73 proteins were found to have  
289 at least 80% similarity to a structurally characterised protein. Three of these six protein  
290 structures were from *Pseudomonas* species, while the other three were from *Burkholderia*  
291 species. Similarity was used rather than identity to account for mutations of functionally similar  
292 residues. The six protein structures were then used as models to predict structurally-informed  
293 B-cell epitopes of length 10-20 residues (Table 4 and Fig 4) using the SEPPA3 server.

294 **Table 4: B-cell epitope prediction.**

| Gene name                  | Predicted epitopes                                                                                                    | Homologue PDB code | Accession number |
|----------------------------|-----------------------------------------------------------------------------------------------------------------------|--------------------|------------------|
| beta-lactamase Toho-1      | RREPELNTALPGDER; TTMRNPNAQARDDVIA                                                                                     | 3W4O               | KGV04506.1       |
| type 1 fimbrial protein    | SSKAYTIAEGDNTF                                                                                                        | 5N2B               | WP_063597677.1   |
| triacylglycerol lipase     | SSTNNTNQDALA; AYVQQVLAATGASK                                                                                          | 1HQD               | WP_038741497.1   |
| class D beta-lactamase     | VSGDPGQNNGLDR                                                                                                         | 6NI0               | EDO89205.1       |
| triacylglycerol lipase     | QQVLAVTGAQK; SHTHNTNQDAIA                                                                                             | 1HQD               | WP_038775093.1   |
| S8 family serine peptidase | SGDEGVYECNNRGYPDGSNYTV;<br>SNETVWNEGLDGNGLW; YECNNRGYPDGSNYTV;<br>MADLDASGNTGLTQ; QTNGSGGNYSDDQEG;<br>GYSGYGYKASTGWDY | 1GA1/1NLU          | WP_004553586.1   |

295 The virulence-associated putative DsbA substrates (Table 2) were screened for  $\geq 80\%$  similarity  
 296 to proteins within the PDB to account for substitution of functionally similar residues. The  
 297 structures were then screened for epitopes using SEPPA 3.0. Fourteen B-cell epitopes of 10 to  
 298 20 residues were predicted.  
 299

300 **Fig 4: Predicted B-cell epitopes.** Graphical representation of B-cell epitopes found in Table  
 301 4. Proteins are shown as white surfaces and their respective PDB ID is given in the bottom  
 302 left corner of each box. The epitope region is highlighted in red and the corresponding  
 303 homologous sequences found in *B. pseudomallei* are given in one letter code under each  
 304 respective structure and separated by semicolon when more than one sequence pointed to the  
 305 same epitope.

306

307 These epitopes provide an interesting list for further evaluation. For example, epitopes from  
 308 beta-lactamase Toho-1 and class D beta-lactamase could provide a useful vaccination approach  
 309 for *B. pseudomallei* because these directly target antibiotic resistance proteins. Similar  
 310 approaches have conferred protection against other bacteria in animal models [54-57].

311

312 Vaccination targeting adhesion proteins and essential virulence factors such as FimA [58, 59]  
 313 and type 1 fimbrial protein is a commonly used approach due to the external localisation of  
 314 these proteins and their exposure to host immune systems. Anti-fimbrial antibodies have been  
 315 shown to interfere with function and reduce disease [60, 61] and a FimA vaccine provided

316 protection against *Streptococcus parasanguis*, *Streptococcus mitis*, *Streptococcus mutans* and  
317 *Streptococcus salivarius* in rats [62-64].

318

319 Vaccination against conserved, secreted enzymes such as the triacylglycerol lipase (EstA) and  
320 S8 family serine peptidase enzymes may also be a useful strategy. Secreted peptidases are  
321 known virulence factors in many pathogenic bacteria [37, 65] and vaccines targeting them have  
322 attenuated disease in animal models [66, 67]. Two triacylglycerol lipases (WP\_038741497.1  
323 and WP\_038775093.1) were identified as having a structural homologue in the PDB. These  
324 two lipases are both core genes and share 78% similarity (72% identity, 87% query cover). and  
325 their sequences were both aligned to the same PDB code, resulting in epitope variants of similar  
326 sequences.

327



## 328 Discussion

329 In the present study, we analysed genomes from 512 *B. pseudomallei* isolates specifically  
330 associated with disease to identify core putative DsbA substrates and virulence factors.  
331 Pangenomic analysis of *B. pseudomallei* has previously been performed utilising 37 isolates  
332 from a variety of isolation sources [36] and concluded the pangenome to be ‘open’, indicating  
333 that new isolates will continually increase the number of total genes, which we found to be the  
334 case, based on a pangenome of 19,991 genes from 512 isolates. Previous studies comparing  
335 the *B. pseudomallei* genome with the obligate pathogen *Burkholderia mallei* (responsible for  
336 glanders) and the generally non-pathogenic *Burkholderia thailandensis* [68-71], identified  
337 several loci likely to be involved in *B. pseudomallei* virulence. These include the capsular  
338 polysaccharide gene cluster and Type III secretion needle complex [71], which were not  
339 considered core genes, demonstrating the importance of large-scale analysis.

340  
341 In the present study, we used two orthogonal approaches to identify a total of 278 putative  
342 DsbA substrates, with 86 predicted to be virulence factors (S5 File). Of these, 73 were  
343 identified by the genome analysis approach and 15 were identified by the DsbA substrate  
344 homology approach. Two of the putative 86 DsbA virulence factor substrates were identified  
345 in both approaches. These two are the experimentally validated bacterial virulence factors and  
346 DsbA substrates succinate dehydrogenase flavoprotein subunit, and a PenI family  $\beta$ -lactamase  
347 (both reported to be *F. tularensis* DsbA substrates) [34].

348  
349 Delving deeper into the results presents some curious outcomes. For example, the well-  
350 characterised *E.coli* DsbA substrate and virulence factor FlgI [27, 72] was not picked up as a  
351 potential *B. pseudomallei* DsbA substrate by either method, though *B. pseudomallei* encodes  
352 FlgI. The *B. pseudomallei* FlgI sequence has 4 cysteines in the translated gene product but the

353 predicted mature sequence after cleavage of the signal sequence has just one cysteine.  
354 Generally, DsbA does not interact with proteins having just one cysteine. If *B. pseudomallei*  
355 FlgI is a DsbA substrate (that is yet to be tested), then the most likely reasons that it was not  
356 identified as a substrate by either of the two methods we used are that (i) the predicted signal  
357 peptide is incorrect and/or (ii) the single cysteine of *B. pseudomallei* FlgI forms an inter-  
358 molecular disulfide bond.

359

360 The finding that the two orthogonal approaches identified the same two target proteins suggests  
361 that there is merit in using different theoretical approaches to select high priority targets for  
362 further evaluation (in this case, the PenI family Beta-lactamase and succinate dehydrogenase  
363 flavoprotein subunit). On the other hand, the fact that there were so few overlaps in the  
364 predicted substrates from the two methods raises questions about the filters we applied.  
365 Specifically, we found that of the 15 potential substrates identified by the substrate homology  
366 method, 5 had an odd numbers of cysteines, whereas the genomic analysis filtered these  
367 proteins out of consideration. We applied the even cysteine filter because previous reports  
368 showed that *E. coli* exported proteins have a strong preference for an even number of cysteines.  
369 This even number of cysteine preference is present in *B. pseudomallei* exported proteins (Fig  
370 2) though is not as pronounced as in *E. coli*. By restricting our genomic analysis to core, extra-  
371 cytoplasmic *B. pseudomallei* proteins with an even number of cysteines, some DsbA substrates  
372 may therefore have been missed. There is considerable evidence that many virulence factors  
373 such as adhesion and motility proteins, toxins and enzymes are extra-cytoplasmic proteins in  
374 both Gram-positive and Gram-negative bacteria [21, 22, 73]. Given that extra-cytoplasmic  
375 proteins in the translated core genome of *B. pseudomallei* have a slight preference for even  
376 number of cysteines (Fig 2) and the identification of many virulence-associated proteins within  
377 the 263 proteins in the list, the approach taken in this analysis (Fig 1) to identify DsbA

378 substrates was justified. Further, the genomic analysis focused on highly conserved proteins  
379 from the core genome; accessory proteins associated with virulence would not be identified  
380 using this approach. Nevertheless, the genomic analysis identified homologues of known DsbA  
381 substrates in other bacteria, such as the OmpA porin, supporting the use of this approach.  
382 However, attempting to identify epitopes from proteins which are not found in every disease-  
383 causing isolate may present challenges for anti-virulence and vaccination attempts.

384

385 In addition, the genomic analysis identified several proteins of unknown function which could  
386 represent novel virulence factors for future studies. Importantly, our theoretical approach was  
387 extended to predict structurally-informed surface epitopes for several core gene DsbA  
388 substrates for potential vaccine or antibody development (Table 4).

389

390 In summary, our *in silico* analysis combined a substrate homology approach and a genomic  
391 analysis approach to identify more than 80 potential *B. pseudomallei* DsbA virulence factor  
392 substrates, two of which we mark as high priority for experimental validation. Future  
393 characterization of these proteins will aid our understanding of *B. pseudomallei* virulence and  
394 could provide new targets for antivirulence drug discovery and vaccine development. The  
395 approaches we report here could also be applied to identify potential DsbA virulence factor  
396 substrates in other pathogenic bacteria.

397

## 398 **Methods**

### 399 **Data acquisition and filtering of core, extra-cytoplasmic, putative**

#### 400 **DsbA substrates**

401 1577 *B. pseudomallei* genomes were obtained from the genome information table from NCBI  
402 (<https://www.ncbi.nlm.nih.gov/genome/genomes/476>) (date accessed: 1/2/20). The biosample  
403 accession numbers were batch downloaded using Entrez. A list of assembly accession numbers  
404 can be found in S1 Fig. Metadata was then scraped for disease association using grep with the  
405 following command:

```
406     grep -A 1 "disease"
```

407

408 The assemblies were then downloaded using Entrez and annotated using a prokka (version  
409 1.14.5) [74] for loop with the following command:

```
410     for file in *.fna; do tag=${file%.fna}; prokka --prefix "$tag" --locustag "$tag" --genus Burkholderia --  
411     species pseudomallei --strain "$tag" --outdir "$tag"_prokka --force --addgenes "$file"; done
```

412

413 The .gff files were used as input for roary (version 3.11.2) [75] without splitting paralogues via  
414 the following command:

```
415     roary -e --mafft -i 90 -v -p 72 -z -s -o output -f *.gff
```

416

417 The roary output file was altered from interleaved fasta to one line per sequence

```
418     awk '{if(NR==1) {print $0} else {if($0 ~ /^>/) {print "\n"$0} else {printf $0}}}' input.fa > output.fa
```

419

420 The core genome was then used in the remaining analysis and core DNA sequences were  
421 translated into protein sequences using transeq [76] with the following command:

```
422     transeq -sequence input.fasta -outseq output.fasta -table 11 -frame 1
```

423

424 The core genome was then filtered based on signal sequence and then the sequence of the  
425 mature exported protein, as predicted utilising SignalP 5.0 [77, 78]

```
426     signalp -fasta prot_core_genome_complete.fasta -format short -mature -org gram- -verbose  
427
```

428 These sequences were then filtered for genes containing even numbers of cysteines

```
429     awk -F\C 'NF % 2' < input.fasta | awk "/C.*C/" | sed '/>/{\$!N;\^n.*>!/P;D}' > output.fasta  
430
```

431 This list was then annotated via screening sequences against NCBI and Gene Ontology [79]  
432 using the PANNZER2 server [80].

433

### 434 **Identification of DsbA substrate homologues in *B. pseudomallei***

435 DsbA substrates were also predicted using a substrate homology search. This approach may  
436 identify proteins not encoded in the core genome. The *B. pseudomallei* genome was screened  
437 for homologues of known DsbA substrates using BLASTP. A starting list of confirmed DsbA  
438 substrates was extracted from the literature [22, 34, 45-48, 81], and their amino acid sequences  
439 used in BLAST searches [82] against the NCBI protein database [43] for homologues in *B.*  
440 *pseudomallei* using default search parameters. In some cases two search proteins identified the  
441 same homologue in *B. pseudomallei*. In these cases only the search protein most similar to the  
442 *B. pseudomallei* homologue is given in Table 3. The results were filtered to select proteins with  
443 at least 20% sequence identity and a sequence coverage of at least 50%. Protein sequences with  
444 fewer than two cysteines were removed. Exported proteins were selected on the basis of  
445 predicted signal sequence (SignalP 5.0 [77]) or experimental evidence of extra-cytoplasmic  
446 localisation for the reported DsbA substrate in another *Burkholderia* species.

447

## 448 **Cysteine distribution analysis**

449 Fasta files containing either the 19,991 pan genes or the 4,496 core gene of *B. pseudomallei*  
450 with their corresponding amino acid sequences and descriptors were utilised to calculate the  
451 distribution of cysteines with a custom Python 3.0 script (available on Github :  
452 ([https://github.com/gpetit99/cysteineCount\\_bPseudomallei/blob/master/CysCountFrequency.](https://github.com/gpetit99/cysteineCount_bPseudomallei/blob/master/CysCountFrequency.py)  
453 [py](https://github.com/gpetit99/cysteineCount_bPseudomallei/blob/master/CysCountFrequency.py)”). Briefly, lists of the extra-cytoplasmic protein sequences with signal peptides removed  
454 were compared to lists of the protein sequences from the whole genome to create dataframes  
455 with either cytoplasmic or extra-cytoplasmic proteins. Proteins were grouped based on the  
456 presence or absence of SP, and based on the number of cysteines in the mature protein. To  
457 calculate the normalised frequency of cysteines for extra-cytoplasmic proteins, we divided  
458 the number of extra-cytoplasmic proteins having N cysteines by the total number of proteins  
459 having N cysteines (N being an integer from 0 to 73 – No protein has more than 73 cysteines  
460 in the *B. pseudomallei* translated genome). This analysis was run for the core genome and  
461 pangenome independently. Other statistics (e.g. number of proteins in each group) were  
462 extracted from the dataframes.

463

## 464 **Epitope prediction**

465 The metadata for each of the 263 proteins in the annotated list was manually inspected to select  
466 for further analysis a total of 73 proteins likely related to virulence. The sequences of these 73  
467 selected proteins were combined with the 15 selected proteins from the homology analysis (to  
468 give 86 unique protein sequences). These were screened against the protein data bank using  
469 BLAST (criteria:  $\geq 80\%$  positive substitutions/similarity used as a threshold) to find structurally  
470 characterised homologues. These structural homologues were then used to predict B-cell  
471 epitopes using SEPPA 3.0 (<http://www.badd-cao.net/seppa3/index.html>) with a threshold of  
472 0.1 [83]. Similarity was used rather than identity to account for mutations of functionally

473 similar residues. Predicted B-cell epitopes were accepted if they were 10 – 20 residues in  
474 length, as described in [84].

475

476

477

## 478 **Acknowledgments**

479 We gratefully acknowledge the support of the Griffith University eResearch Services Team  
480 and the use of the High Performance Computing Cluster "Gowonda" to complete this research.

481

## 482 **Conflict of interest**

483 The authors declare that there are no conflicts of interest.

484

485

486 .



## 487 **References**

- 488 1. White N. Melioidosis. *The Lancet* 2003;361(9370):1715-22. DOI: [10.1016/s0140-](https://doi.org/10.1016/s0140-6736(03)13374-0)  
489 [6736\(03\)13374-0](https://doi.org/10.1016/s0140-6736(03)13374-0)
- 490 2. Chakravorty A, Heath C. Melioidosis: An updated review. *Aus J Gen Pract*  
491 2019;48:327-32. DOI: [10.31128/AIGP-04-18-4558](https://doi.org/10.31128/AIGP-04-18-4558)
- 492 3. Willcocks SJ, Denman CC, Atkins HS, Wren BW. Intracellular replication of the well-  
493 armed pathogen *Burkholderia pseudomallei*. *Curr Opin Microbiol* 2016;29:94-103. DOI:  
494 [10.1016/j.mib.2015.11.007](https://doi.org/10.1016/j.mib.2015.11.007)
- 495 4. Wiersinga WJ, Virk HS, Torres AG, Currie BJ, Peacock SJ, Dance DAB, et al.  
496 Melioidosis. *Nat Rev Dis Primers* 2018;4:17107. DOI: [10.1038/nrdp.2017.107](https://doi.org/10.1038/nrdp.2017.107)
- 497 5. Rhodes KA, Schweizer HP. Antibiotic resistance in *Burkholderia* species. *Drug*  
498 *Resist Updat* 2016;28:82-90. DOI: [10.1016/j.drug.2016.07.003](https://doi.org/10.1016/j.drug.2016.07.003)
- 499 6. Podnecky NL, Rhodes KA, Mima T, Drew HR, Chirakul S, Wuthiekanun V, et al.  
500 Mechanisms of resistance to folate pathway inhibitors in *Burkholderia pseudomallei*:  
501 deviation from the norm. *mBio* 2017;8(5):e01357-17. DOI: [10.1128/mBio.01357-17](https://doi.org/10.1128/mBio.01357-17)
- 502 7. Held K, Gasper J, Morgan S, Siehnel R, Singh P, Manoil C. Determinants of extreme  
503  $\beta$ -lactam tolerance in the *Burkholderia pseudomallei* complex. *Antimicrob Agents Chemother*  
504 2018;62(4):e00068-18. DOI: [10.1128/AAC.00068-18](https://doi.org/10.1128/AAC.00068-18)
- 505 8. Podnecky NL, Rhodes KA, Schweizer HP. Efflux pump-mediated drug resistance in  
506 *Burkholderia*. *Front Microbiol* 2015;6:305. DOI: [10.3389/fmicb.2015.00305](https://doi.org/10.3389/fmicb.2015.00305)
- 507 9. Schweizer HP. Mechanisms of antibiotic resistance in *Burkholderia pseudomallei*:  
508 implications for treatment of melioidosis. *Future microbiol* 2012;7(12):1389-99. DOI:  
509 [10.2217/fmb.12.116](https://doi.org/10.2217/fmb.12.116)
- 510 10. Dance D. Treatment and prophylaxis of melioidosis. *Int J Antimicrob Agent*  
511 2014;43(4):310-8. DOI: [10.1016/j.ijantimicag.2014.01.005](https://doi.org/10.1016/j.ijantimicag.2014.01.005)

- 512 11. Antimicrobial resistance: global report on surveillance: World Health Organization;  
513 2014.
- 514 12. Kennedy DA, Read AF. Why the evolution of vaccine resistance is less of a concern  
515 than the evolution of drug resistance. *Proc Natl Acad Sci U S A*. 2018;115(51):12878-86.  
516 DOI: [10.1073/pnas.1717159115](https://doi.org/10.1073/pnas.1717159115)
- 517 13. Thabit AK, Crandon JL, Nicolau DP. Antimicrobial resistance: impact on clinical and  
518 economic outcomes and the need for new antimicrobials. *Expert Opin Pharmacother*  
519 2015;16(2):159-77. DOI: [10.1517/14656566.2015.993381](https://doi.org/10.1517/14656566.2015.993381)
- 520 14. Rasko DA, Sperandio V. Anti-virulence strategies to combat bacteria-mediated  
521 disease. *Nat Rev Drug Discov* 2010;9(2):117-28. DOI: [10.1038/nrd3013](https://doi.org/10.1038/nrd3013)
- 522 15. Johnson MM, Ainslie KM. Vaccines for the Prevention of Melioidosis and Glanders.  
523 *Curr Trop Med Rep* 2017;4(3):136-45. DOI: [10.1007/s40475-017-0121-7](https://doi.org/10.1007/s40475-017-0121-7)
- 524 16. Hara Y, Mohamed R, Nathan S. Immunogenic *Burkholderia pseudomallei* outer  
525 membrane proteins as potential candidate vaccine targets. *PLoS One* 2009;4(8):e6496. DOI:  
526 [10.1371/journal.pone.0006496](https://doi.org/10.1371/journal.pone.0006496)
- 527 17. Nagpal G, Usmani SS, Raghava GPS. A Web Resource for Designing Subunit  
528 Vaccine Against Major Pathogenic Species of Bacteria. *Front Immunol* 2018;9(2280). DOI:  
529 [10.3389/fimmu.2018.02280](https://doi.org/10.3389/fimmu.2018.02280)
- 530 18. Mühlen S, Dersch P. Anti-virulence Strategies to Target Bacterial Infections. In:  
531 Stadler M, Dersch P, editors. How to Overcome the Antibiotic Crisis : Facts, Challenges,  
532 Technologies and Future Perspectives. Cham: Springer International Publishing; 2016. p.  
533 147-83.
- 534 19. Heras B, Scanlon MJ, Martin JL. Targeting virulence not viability in the search for  
535 future antibacterials. *Brit J Clin Pharmacol* 2015;79(2):208-15. DOI: [10.1111/bcp.12356](https://doi.org/10.1111/bcp.12356)

- 536 20. Anfinsen CB. Principles that govern the folding of protein chains. *Science*  
537 1973;181(4096):223-30. DOI: [10.1126/science.181.4096.223](https://doi.org/10.1126/science.181.4096.223)
- 538 21. Smith RP, Paxman JJ, Scanlon MJ, Heras B. Targeting Bacterial Dsb Proteins for the  
539 Development of Anti-Virulence Agents. *Molecules* 2016;21(7). DOI:  
540 [10.3390/molecules21070811](https://doi.org/10.3390/molecules21070811)
- 541 22. Heras B, Shouldice SR, Totsika M, Scanlon MJ, Schembri MA, Martin JL. DSB  
542 proteins and bacterial pathogenicity. *Nat Rev Microbiol* 2009;7(3):215. DOI:  
543 [10.1038/nrmicro2087](https://doi.org/10.1038/nrmicro2087)
- 544 23. Bocian-Ostrzycka KM, Grzeszczuk MJ, Banaś AM, Jagusztyn-Krynicka EK.  
545 Bacterial thiol oxidoreductases—from basic research to new antibacterial strategies. *Appl*  
546 *Microbiol Biotechnol* 2017;101(10):3977-89. DOI: [10.1007/s00253-017-8291-8](https://doi.org/10.1007/s00253-017-8291-8)
- 547 24. Shouldice SR, Heras B, Walden PM, Totsika M, Schembri MA, Martin JL. Structure  
548 and function of DsbA, a key bacterial oxidative folding catalyst. *Antioxid Redox Signal*  
549 2011;14(9):1729-60. DOI: [10.1089/ars.2010.3344](https://doi.org/10.1089/ars.2010.3344)
- 550 25. Ireland PM, McMahon RM, Marshall LE, Halili M, Furlong E, Tay S, et al.  
551 Disarming Burkholderia pseudomallei: structural and functional characterization of a  
552 disulfide oxidoreductase (DsbA) required for virulence in vivo. *Antioxid Redox Signal*  
553 2014;20(4):606-17. DOI: [10.1089/ars.2013.5375](https://doi.org/10.1089/ars.2013.5375)
- 554 26. McMahon RM, Ireland PM, Sarovich DS, Petit G, Jenkins CH, Sarkar-Tyson M, et al.  
555 Virulence of the Melioidosis Pathogen Burkholderia pseudomallei Requires the  
556 Oxidoreductase Membrane Protein DsbB. *Infect Immun* 2018;86(5) DOI: [10.1128/IAI.00938-](https://doi.org/10.1128/IAI.00938-17)  
557 [17](https://doi.org/10.1128/IAI.00938-17)
- 558 27. Dailey FE, Berg HC. Mutants in disulfide bond formation that disrupt flagellar  
559 assembly in *Escherichia coli*. *Proc Natl Acad Sci USA* 1993;90(3):1043-7. DOI:  
560 [10.1073/pnas.90.3.1043](https://doi.org/10.1073/pnas.90.3.1043)

- 561 28. Totsika M, Heras B, Wurpel DJ, Schembri MA. Characterization of two homologous  
562 disulfide bond systems involved in virulence factor biogenesis in uropathogenic *Escherichia*  
563 *coli* CFT073. *J Bacteriol* 2009;191(12):3901-8 DOI: [10.1128/JB.00143-09](https://doi.org/10.1128/JB.00143-09)
- 564 29. Kurth F, Rimmer K, Premkumar L, Mohanty B, Duprez W, Halili MA, et al.  
565 Comparative sequence, structure and redox analyses of *Klebsiella pneumoniae* DsbA show  
566 that anti-virulence target DsbA enzymes fall into distinct classes. *PLoS One*  
567 2013;8(11):e80210. DOI: [10.1371/journal.pone.0080210](https://doi.org/10.1371/journal.pone.0080210)
- 568 30. Heras B, Totsika M, Jarrott R, Shouldice SR, Guncar G, Achard MES, et al.  
569 Structural and functional characterization of three DsbA paralogues from *Salmonella enterica*  
570 serovar Typhimurium. *J Biol Chem* 2010;285(24):18423-32. DOI: [10.1074/jbc.M110.101360](https://doi.org/10.1074/jbc.M110.101360)
- 571 31. Straskova A, Pavkova I, Link M, Forslund A-L, Kuoppa K, Noppa L, et al. Proteome  
572 analysis of an attenuated *Francisella tularensis* dsbA mutant: Identification of potential  
573 DsbA substrate proteins. *J Proteome Res* 2009;8(11):5336-46. DOI: [10.1021/pr900570b](https://doi.org/10.1021/pr900570b)
- 574 32. Hatahet F, Boyd D, Beckwith J. Disulfide bond formation in prokaryotes: history,  
575 diversity and design. *Biochim Biophys Acta* 2014;1844(8):1402-14. DOI:  
576 [10.1016/j.bbapap.2014.02.014](https://doi.org/10.1016/j.bbapap.2014.02.014)
- 577 33. Dutton RJ, Boyd D, Berkmen M, Beckwith J. Bacterial species exhibit diversity in  
578 their mechanisms and capacity for protein disulfide bond formation. *Proc Natl Acad Sci USA*  
579 2008;105(33):11933-8. DOI: [10.1073/pnas.0804621105](https://doi.org/10.1073/pnas.0804621105)
- 580 34. Ren G, Champion MM, Huntley JF. Identification of disulfide bond isomerase  
581 substrates reveals bacterial virulence factors. *Mol Microbiol* 2014;94(4):926-44. DOI:  
582 [10.1111/mmi.12808](https://doi.org/10.1111/mmi.12808)
- 583 35. Benson DA, Clark K, Karsch-Mizrachi I, Lipman DJ, Ostell J, Sayers EW. GenBank.  
584 *Nucleic acids research*. 2015;43(Database issue):D30.

- 585 36. Spring-Pearson SM, Stone JK, Doyle A, Allender CJ, Okinaka RT, Mayo M, *et al.*  
586 Pangenome analysis of *Burkholderia pseudomallei*: Genome evolution preserves gene order  
587 despite high recombination rates. *PLoS One* 2015;10(10):e0140274. DOI:  
588 [10.1371/journal.pone.0140274](https://doi.org/10.1371/journal.pone.0140274)
- 589 37. Backert S, Bernegger S, Skórko-Glonek J, Wessler S. Extracellular HtrA serine  
590 proteases: An emerging new strategy in bacterial pathogenesis. *Cell Microbiol*  
591 2018;20(6):e12845. DOI: [10.1111/cmi.12845](https://doi.org/10.1111/cmi.12845)
- 592 38. Gosink KK, Mann ER, Guglielmo C, Tuomanen EI, Masure HR. Role of novel  
593 choline binding proteins in virulence of *Streptococcus pneumoniae*. *Infect Immun*  
594 2000;68(10):5690-5. DOI: [10.1128/iai.68.10.5690-5695.2000](https://doi.org/10.1128/iai.68.10.5690-5695.2000)
- 595 39. Nakamya MF, Ayoola MB, Park S, Shack LA, Swiatlo E, Nanduri B. The role of  
596 cadaverine synthesis on *Pneumococcal* capsule and protein expression. *Med Sci (Basel)*  
597 2018;6(1):8. DOI: [10.3390/medsci6010008](https://doi.org/10.3390/medsci6010008)
- 598 40. Koski P, Vaara M. Polyamines as constituents of the outer membranes of *Escherichia*  
599 *coli* and *Salmonella typhimurium*. *J Bacteriol* 1991;173(12):3695-9. DOI:  
600 [10.1128/jb.173.12.3695-3699.1991](https://doi.org/10.1128/jb.173.12.3695-3699.1991)
- 601 41. Yethon JA, Vinogradov E, Perry MB, Whitfield C. Mutation of the  
602 lipopolysaccharide core glycosyltransferase encoded by waaG destabilizes the outer  
603 membrane of *Escherichia coli* by interfering with core phosphorylation. *J Bacteriol*  
604 2000;182(19):5620-3. DOI: [10.1128/jb.182.19.5620-5623.2000](https://doi.org/10.1128/jb.182.19.5620-5623.2000)
- 605 42. Wortham BW, Oliveira MA, Fetherston JD, Perry RD. Polyamines are required for  
606 the expression of key Hms proteins important for *Yersinia pestis* biofilm formation. *Environ*  
607 *Microbiol* 2010;12(7):2034-47. DOI: [10.1111/j.1462-2920.2010.02219.x](https://doi.org/10.1111/j.1462-2920.2010.02219.x)
- 608 43. Database resources of the National Center for Biotechnology Information. *Nucleic*  
609 *Acids Res.* 2016;44(D1):D7-19. DOI: [10.1093/nar/gkv1290](https://doi.org/10.1093/nar/gkv1290)

- 610 44. Hayashi S, Abe M, Kimoto M, Furukawa S, Nakazawa T. The dsbA-dsbB disulfide  
611 bond formation system of *Burkholderia cepacia* is involved in the production of protease and  
612 alkaline phosphatase, motility, metal resistance, and multi-drug resistance. *Microbiol*  
613 *Immunol* 2000;44(1):41-50. DOI: [10.1111/j.1348-0421.2000.tb01244.x](https://doi.org/10.1111/j.1348-0421.2000.tb01244.x)
- 614 45. Corbett C, Burtnick M, Kooi C, Woods D, Sokol P. An extracellular zinc  
615 metalloprotease gene of *Burkholderia cepacia*. *Microbiology*. 2003;149(8):2263-71. DOI:  
616 [10.1099/mic.0.26243-0](https://doi.org/10.1099/mic.0.26243-0)
- 617 46. Abe M, Nakazawa T. The dsbB gene product is required for protease production by  
618 *Burkholderia cepacia*. *Infect Immun* 1996;64(10):4378-80.
- 619 47. Kooi C, Subsin B, Chen R, Pohorelic B, Sokol P. *Burkholderia cenocepacia* ZmpB is  
620 a broad-specificity zinc metalloprotease involved in virulence. *Infect Immun*  
621 2006;74(7):4083-93. DOI: [10.1128/JAI.00297-06](https://doi.org/10.1128/JAI.00297-06)
- 622 48. Kooi C, Corbett C, Sokol P. Functional analysis of the *Burkholderia cenocepacia*  
623 ZmpA metalloprotease. *J Bacteriol* 2005;187(13):4421-9. DOI: [10.1128/JB.187.13.4421-  
624 4429.2005](https://doi.org/10.1128/JB.187.13.4421-4429.2005)
- 625 49. Papp-Wallace KM, Becka SA, Taracila MA, Winkler ML, Gatta JA, Rholl DA, *et al.*  
626 Exposing a  $\beta$ -Lactamase “Twist”: the mechanistic basis for the high level of ceftazidime  
627 resistance in the C69F variant of the *Burkholderia pseudomallei* PenI  $\beta$ -Lactamase.  
628 *Antimicrob Agents Chemother* 2016;60(2):777-88. DOI: [10.1128/aac.02073-15](https://doi.org/10.1128/aac.02073-15)
- 629 50. Miki T, Okada N, Danbara H. Two periplasmic disulfide oxidoreductases, DsbA and  
630 SrgA, target outer membrane protein SpiA, a component of the *Salmonella* pathogenicity  
631 island 2 Type III secretion system. *J Biol Chem* 2004;279(33):34631-42. DOI:  
632 [10.1074/jbc.M402760200](https://doi.org/10.1074/jbc.M402760200)

- 633 51. Miki T, Okada N, Kim Y, Abe A, Danbara H. DsbA directs efficient expression of  
634 outer membrane secretin EscC of the enteropathogenic *Escherichia coli* Type III secretion  
635 apparatus. *Microb Pathog* 2008;44(2):151-8. DOI: [10.1016/j.micpath.2007.09.001](https://doi.org/10.1016/j.micpath.2007.09.001)
- 636 52. Paxman JJ, Borg NA, Horne J, Thompson PE, Chin Y, Sharma P, et al. The structure  
637 of the bacterial oxidoreductase enzyme DsbA in complex with a peptide reveals a basis for  
638 substrate specificity in the catalytic cycle of DsbA enzymes. *J Biol Chem*  
639 2009;284(26):17835-45 DOI: [10.1074/jbc.M109.011502](https://doi.org/10.1074/jbc.M109.011502)
- 640 53. H.M. Berman, J. Westbrook, Z. Feng, G. Gilliland, T.N. Bhat, H. Weissig, I.N.  
641 Shindyalov, P.E. Bourne The Protein Data Bank *Nucleic Acids Research* 2000; 28: 235-7.  
642 DOI: [10.1093/nar/28.1.235](https://doi.org/10.1093/nar/28.1.235)
- 643 54. Lipsitch M, Siber GR. How Can Vaccines Contribute to Solving the Antimicrobial  
644 Resistance Problem? *mBio* 2016;7(3):e00428-16. DOI: [10.1128/mBio.00428-16](https://doi.org/10.1128/mBio.00428-16)
- 645 55. Senna JP, Roth DM, Oliveira JS, Machado DC, Santos DS. Protective immune  
646 response against methicillin resistant *Staphylococcus aureus* in a murine model using a DNA  
647 vaccine approach. *Vaccine* 2003;21(19-20):2661-6. DOI: [10.1016/s0264-410x\(02\)00738-7](https://doi.org/10.1016/s0264-410x(02)00738-7)
- 648 56. Zarantonelli ML, Antignac A, Lancellotti M, Guiyoule A, Alonso J-M, Taha M-K.  
649 Immunogenicity of meningococcal PBP2 during natural infection and protective activity of  
650 anti-PBP2 antibodies against meningococcal bacteraemia in mice. *J Antimicrob Chemother*  
651 2006;57(5):924-30. DOI: [10.1093/jac/dkl066](https://doi.org/10.1093/jac/dkl066)
- 652 57. Ciofu O, Bagge N, Høiby N. Antibodies against  $\beta$ -lactamase can improve ceftazidime  
653 treatment of lung infection with  $\beta$ -lactam-resistant *Pseudomonas aeruginosa* in a rat model of  
654 chronic lung infection. *APMIS* 2002;110(12):881-91. DOI: [10.1034/j.1600-](https://doi.org/10.1034/j.1600-0463.2002.1101207.x)  
655 [0463.2002.1101207.x](https://doi.org/10.1034/j.1600-0463.2002.1101207.x)

- 656 58. Fenno JC, Shaikh A, Spatafora G, Fives-Taylor P. The fimA locus of *Streptococcus*  
657 *parasanguis* encodes an ATP-binding membrane transport system. *Mol Microbiol*  
658 1995;15(5):849-63. DOI: [10.1111/j.1365-2958.1995.tb02355.x](https://doi.org/10.1111/j.1365-2958.1995.tb02355.x)
- 659 59. Liu C-C, Ou S-C, Tan D-H, Hsieh M-K, Shien J-H, Chang P-C. The fimbrial protein  
660 is a virulence factor and potential vaccine antigen of *Avibacterium paragallinarum*. *Avian*  
661 *Dis* 2016;60(3):649-55. DOI: [10.1637/11410-031316-Reg.1](https://doi.org/10.1637/11410-031316-Reg.1)
- 662 60. Holmgren J, Svennerholm A-M. Vaccines against mucosal infections. *Curr Opin*  
663 *Immunol* 2012;24(3):343-53. DOI: [10.1016/j.coi.2012.03.014](https://doi.org/10.1016/j.coi.2012.03.014)
- 664 61. Singh B, Mortezaei N, Savarino SJ, Uhlin BE, Bullitt E, Andersson M. Antibodies  
665 damage the resilience of fimbriae, causing them to be stiff and tangled. *J Bacteriol*  
666 2016;199(1):e00665-16. DOI: [10.1128/JB.00665-16](https://doi.org/10.1128/JB.00665-16)
- 667 62. Viscount HB, Munro CL, Burnette-Curley D, Peterson DL, Macrina FL.  
668 Immunization with FimA protects against *Streptococcus parasanguis* endocarditis in rats.  
669 *Infect Immun* 1997;65(3):994-1002.
- 670 63. Kitten T, Munro CL, Wang A, Macrina FL. Vaccination with FimA from  
671 *Streptococcus parasanguis* protects rats from endocarditis caused by other viridans  
672 streptococci. *Infect Immun* 2002;70(1):422-5. DOI: [10.1128/jai.70.1.422-425.2002](https://doi.org/10.1128/jai.70.1.422-425.2002)
- 673 64. Vandemaele F, Ververken C, Bleyen N, Geys J, D'Hulst C, Addwebi T, *et al.*  
674 Immunization with the binding domain of FimH, the adhesin of type 1 fimbriae, does not  
675 protect chickens against avian pathogenic *Escherichia coli*. *Avian Pathol* 2005;34(3):264-72.  
676 DOI: [10.1080/03079450500112682](https://doi.org/10.1080/03079450500112682)
- 677 65. Hritonenko V, Stathopoulos C. Omptin proteins: an expanding family of outer  
678 membrane proteases in Gram-negative *Enterobacteriaceae*. *Mol Membr Biol* 2007;24(5-  
679 6):395-406. DOI: [10.1080/09687680701443822](https://doi.org/10.1080/09687680701443822)



- 680 66. Santillan DA, Andracki ME, Hunter SK. Protective immunization in mice against  
681 group B streptococci using encapsulated C5a peptidase. *Am J Obstet Gynecol*  
682 2008;198(1):114. e1-e6. DOI: [10.1016/j.ajog.2007.06.003](https://doi.org/10.1016/j.ajog.2007.06.003)
- 683 67. Marana MH, Jørgensen LvG, Skov J, Chettri JK, Holm Mattsson A, Dalsgaard I, *et*  
684 *al.* Subunit vaccine candidates against *Aeromonas salmonicida* in rainbow trout  
685 *Oncorhynchus mykiss*. *PLoS One* 2017;12(2):e0171944. DOI: [10.1371/journal.pone.0171944](https://doi.org/10.1371/journal.pone.0171944)
- 686 68. Ong C, Ooi CH, Wang D, Chong H, Ng KC, Rodrigues F, *et al.* Patterns of large-  
687 scale genomic variation in virulent and avirulent *Burkholderia* species. *Genome Res*  
688 2004;14(11):2295-307. DOI: [10.1101/gr.1608904](https://doi.org/10.1101/gr.1608904)
- 689 69. Kim HS, Schell MA, Yu Y, Ulrich RL, Sarria SH, Nierman WC, *et al.* Bacterial  
690 genome adaptation to niches: divergence of the potential virulence genes in three  
691 *Burkholderia* species of different survival strategies. *BMC Genomics* 2005;6(1):174. DOI:  
692 [10.1186/1471-2164-6-174](https://doi.org/10.1186/1471-2164-6-174)
- 693 70. Majerczyk CD, Brittnacher MJ, Jacobs MA, Armour CD, Radey MC, Bunt R, *et al.*  
694 Cross-species comparison of the *Burkholderia pseudomallei*, *Burkholderia thailandensis*, and  
695 *Burkholderia mallei* quorum-sensing regulons. *J Bacteriol* 2014;196(22):3862-71. DOI:  
696 [10.1128/JB.01974-14](https://doi.org/10.1128/JB.01974-14)
- 697 71. Yu Y, Kim HS, Chua HH, Lin CH, Sim SH, Lin D, *et al.* Genomic patterns of  
698 pathogen evolution revealed by comparison of *Burkholderia pseudomallei*, the causative  
699 agent of melioidosis, to avirulent *Burkholderia thailandensis*. *BMC Microbiology*  
700 2006;6(1):46. DOI: [10.1186/1471-2180-6-46](https://doi.org/10.1186/1471-2180-6-46)
- 701 72. Hizukuri Y, Yakushi T, Kawagishi I, Homma M. Role of the intramolecular disulfide  
702 bond in FlgI, the flagellar P-ring component of *Escherichia coli*. *J Bacteriol*  
703 2006;188(12):4190-7 DOI: [10.1128/JB.01896-05](https://doi.org/10.1128/JB.01896-05)

- 704 73. Allen RC, Popat R, Diggle SP, Brown SP. Targeting virulence: can we make  
705 evolution-proof drugs? *Nat Rev Microbiol* 2014;12(4):300-8. DOI: [10.1038/nrmicro3232](https://doi.org/10.1038/nrmicro3232)
- 706 74. Seemann T. Prokka: rapid prokaryotic genome annotation. *Bioinformatics*.  
707 2014;30(14):2068-9 DOI: [10.1093/bioinformatics/btu153](https://doi.org/10.1093/bioinformatics/btu153)
- 708 75. Page AJ, Cummins CA, Hunt M, Wong VK, Reuter S, Holden MT, *et al.* Roary: rapid  
709 large-scale prokaryote pan genome analysis. *Bioinformatics* 2015;31(22):3691-3. DOI:  
710 [10.1093/bioinformatics/btv421](https://doi.org/10.1093/bioinformatics/btv421)
- 711 76. Madeira F, Park YM, Lee J, Buso N, Gur T, Madhusoodanan N, *et al.* The EMBL-  
712 EBI search and sequence analysis tools APIs in 2019. *Nucleic Acids Res*  
713 2019;47(W1):W636-W41. DOI: [10.1093/nar/gkz268](https://doi.org/10.1093/nar/gkz268)
- 714 77. Almagro Armenteros JJ, Tsirigos KD, Sonderby CK, Petersen TN, Winther O,  
715 Brunak S, *et al.* SignalP 5.0 improves signal peptide predictions using deep neural networks.  
716 *Nat Biotechnol* 2019;37(4):420-3. DOI: [10.1038/s41587-019-0036-z](https://doi.org/10.1038/s41587-019-0036-z)
- 717 78. Käll L, Krogh A, Sonnhammer EL. Advantages of combined transmembrane  
718 topology and signal peptide prediction—the Phobius web server. *Nucleic Acids Res*  
719 2007;35(Supplementary 2 Web server issue):W429-W32. DOI: [10.1093/nar/gkm256](https://doi.org/10.1093/nar/gkm256)
- 720 79. Gene Ontology Consortium. The Gene Ontology (GO) database and informatics  
721 resource. *Nucleic Acids Res* 2004;32(Supplementary 1 Database issue):D258-D61. DOI:  
722 [10.1093/nar/gkh036](https://doi.org/10.1093/nar/gkh036)
- 723 80. Törönen P, Medlar A, Holm L. PANNZER2: a rapid functional annotation web  
724 server. *Nucleic Acids Res* 2018;46(W1):W84-W8. DOI: [10.1093/nar/gky350](https://doi.org/10.1093/nar/gky350)
- 725 81. Hayashi S, Abe M, Kimoto M, Furukawa S, Nakazawa T. The dsbA-dsbB disulfide  
726 bond formation system of *Burkholderia cepacia* is involved in the production of protease and  
727 alkaline phosphatase, motility, metal resistance, and multi-drug resistance. *Microbiol*  
728 *Immunol* 2000;44(1):41-50. DOI: [10.1111/j.1348-0421.2000.tb01244.x](https://doi.org/10.1111/j.1348-0421.2000.tb01244.x)

729 82. Johnson M, Zaretskaya I, Raytselis Y, Merezhuk Y, McGinnis S, Madden TL. NCBI  
730 BLAST: a better web interface. *Nucleic Acids Res* 2008;36(Supplementary 2 Web Server  
731 issue):W5-9. DOI: [10.1093/nar/gkn201](https://doi.org/10.1093/nar/gkn201)

732 83. Zhou C, Chen Z, Zhang L, Yan D, Mao T, Tang K, *et al.* SEPPA 3.0—enhanced  
733 spatial epitope prediction enabling glycoprotein antigens. *Nucleic Acids Res*  
734 2019;47(W1):W388-W94. DOI: [10.1093/nar/gkz413](https://doi.org/10.1093/nar/gkz413)

735 84. Shey RA, Ghogomu SM, Esoh KK, Nebangwa ND, Shintouo CM, Nongley NF, *et al.*  
736 In-silico design of a multi-epitope vaccine candidate against onchocerciasis and related  
737 filarial diseases. *Sci Rep* 2019;9(1):1-18. DOI: [10.1038/s41598-019-40833-x](https://doi.org/10.1038/s41598-019-40833-x)

738

## 739 **Supporting Information**

740 **S1 Fig.** Accession numbers for disease related genomes of *B. pseudomallei* used in this  
741 analysis

742 **S2 Fig.** Core genome (4,496 gene products) of disease related *B. pseudomallei* (fasta format).

743 **S3 Fig** *B. pseudomallei* proteins from the core genome with a signal peptide (removed before  
744 counting cysteines) and even number of cysteines (263 proteins, fasta format).

745 **S4 File Gene Ontology (GO) classification of the gene and gene-product descriptions.**

746 **S5 File Predicted virulence-associated substrates of DsbA**

747 **S6 File Predicted B-cell epitopes**

748

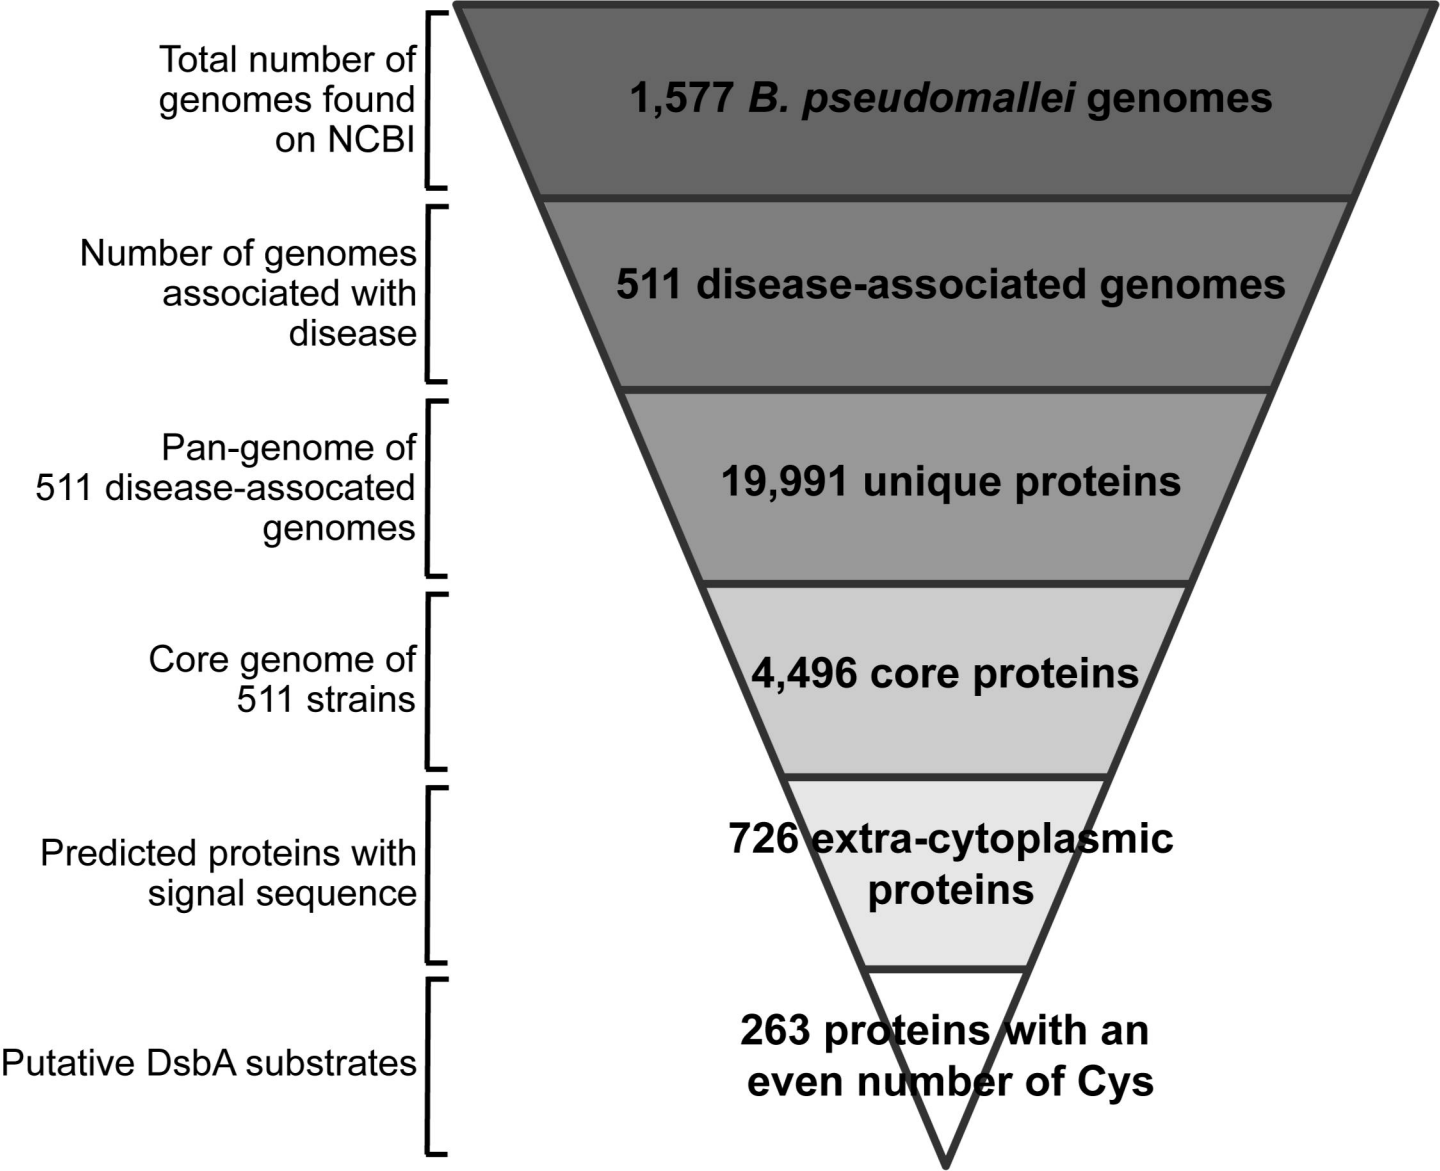

Total number of genomes found on NCBI

**1,577 *B. pseudomallei* genomes**

Number of genomes associated with disease

**511 disease-associated genomes**

Pan-genome of 511 disease-associated genomes

**19,991 unique proteins**

Core genome of 511 strains

**4,496 core proteins**

Predicted proteins with signal sequence

**726 extra-cytoplasmic proteins**

Putative DsbA substrates

**263 proteins with an even number of Cys**

# Pangenome

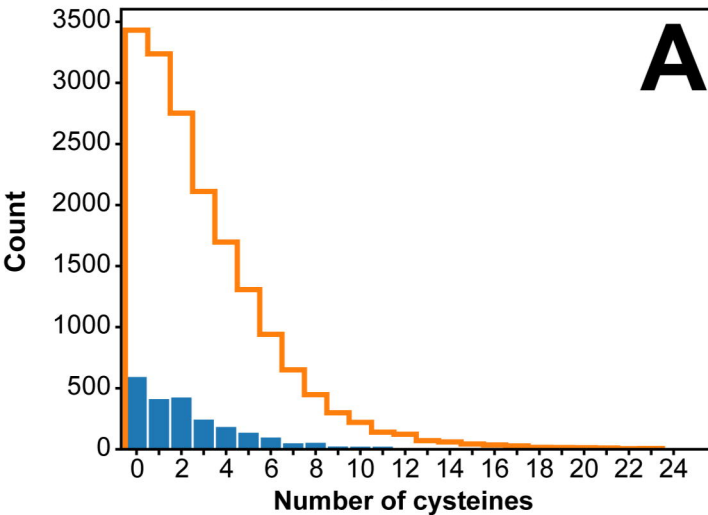

# Core genome

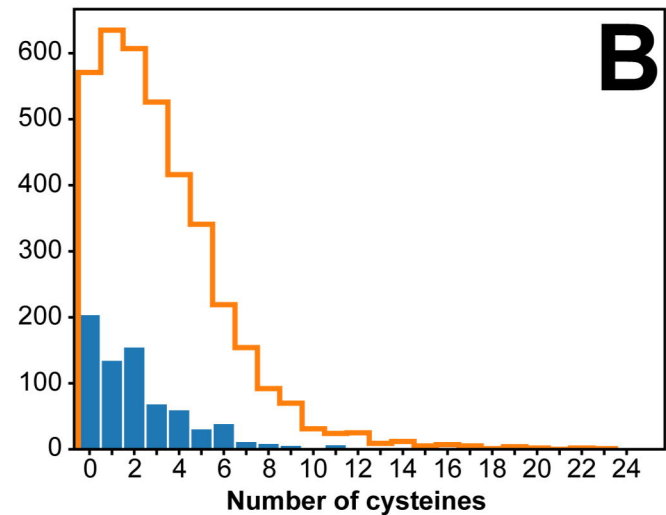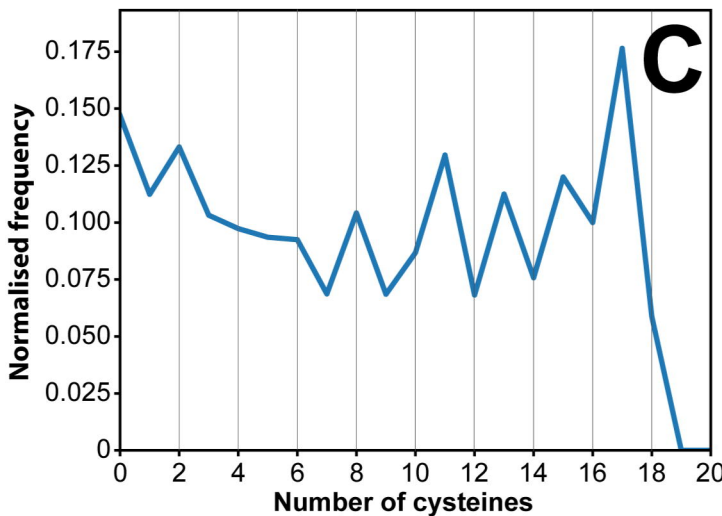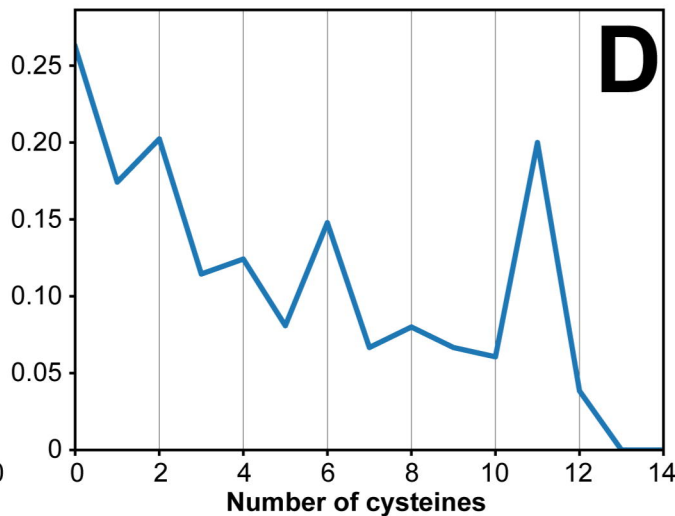

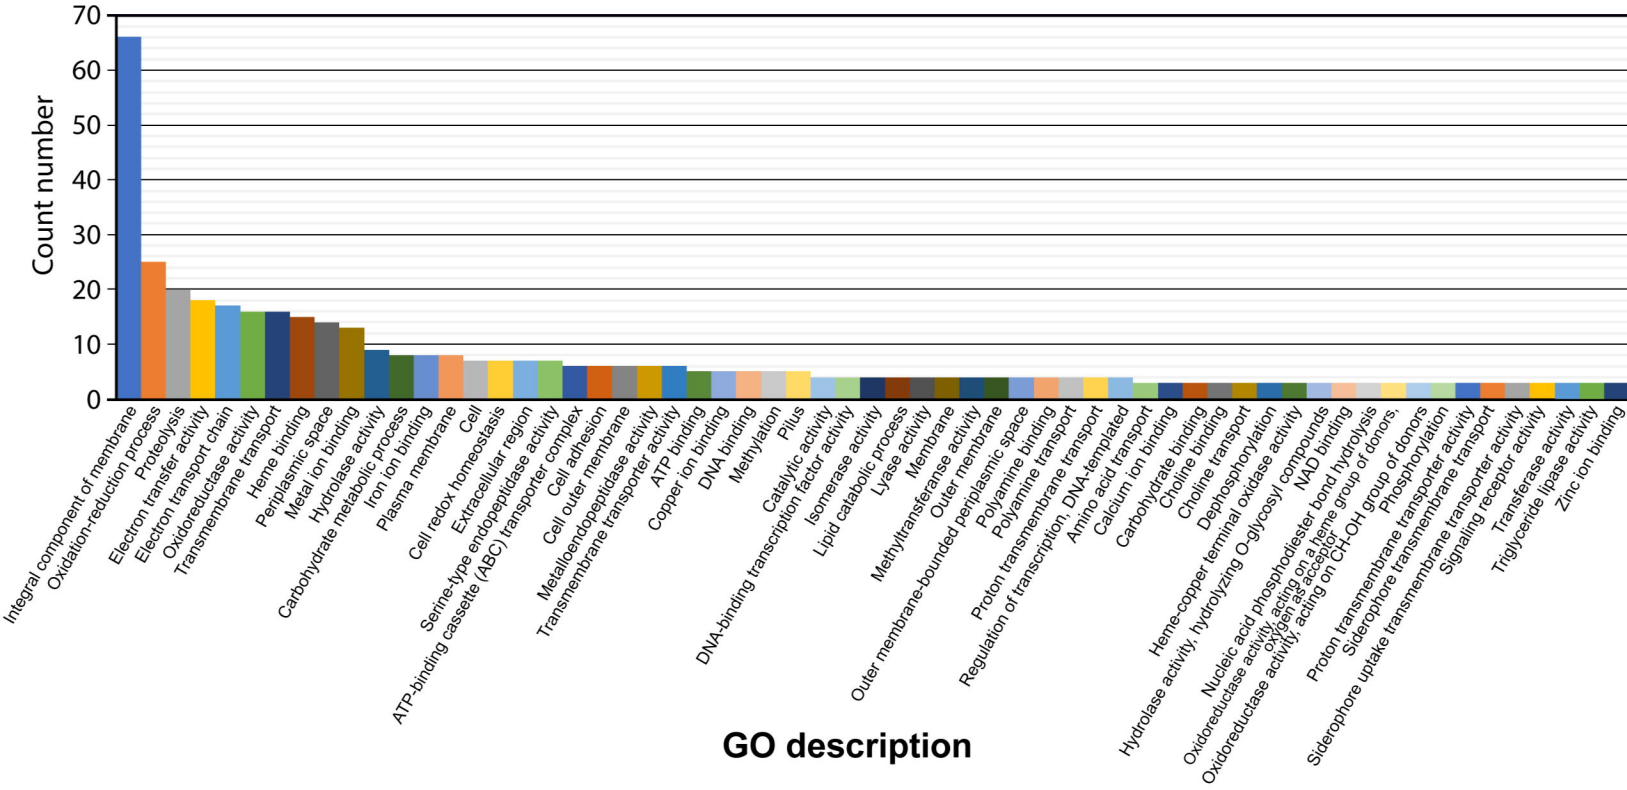

Beta-lactamase Toho-1 (KGV04506.1)

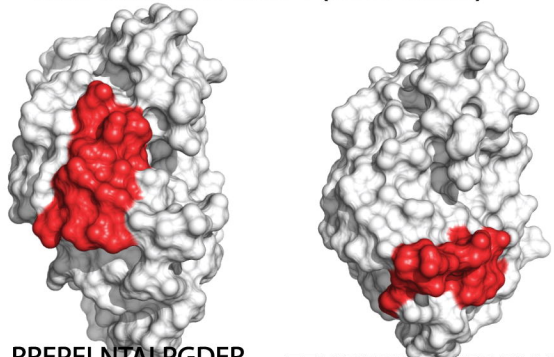

RREPELNTALPGDER

TTMRNPNAQARDDVIA

**3W4O**

Type 1 fimbrial protein  
(WP\_063597677.1)

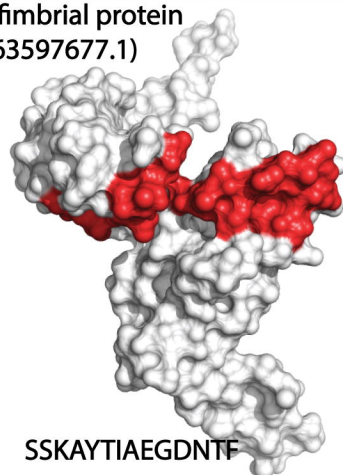

SSKAYTIAEGDNTE

**5N2B**

Triacylglycerol lipase (WP\_063597677.1 and  
WP\_038775093.1)

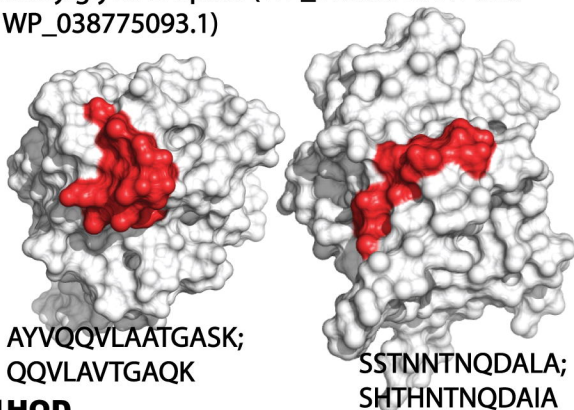

AYVQQVLAATGASK;  
QQVLAVTGAQK

SSTNNTNQDALA;  
SHTHTNQDAIA

**1HQD**

Class D beta-lactamase (EDO89205.1)

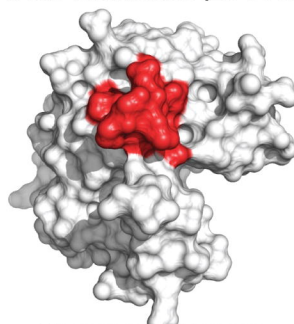

VSGDPGQNNGLDR

**6NIO**

S8 family serine peptidase (WP\_004553586.1)

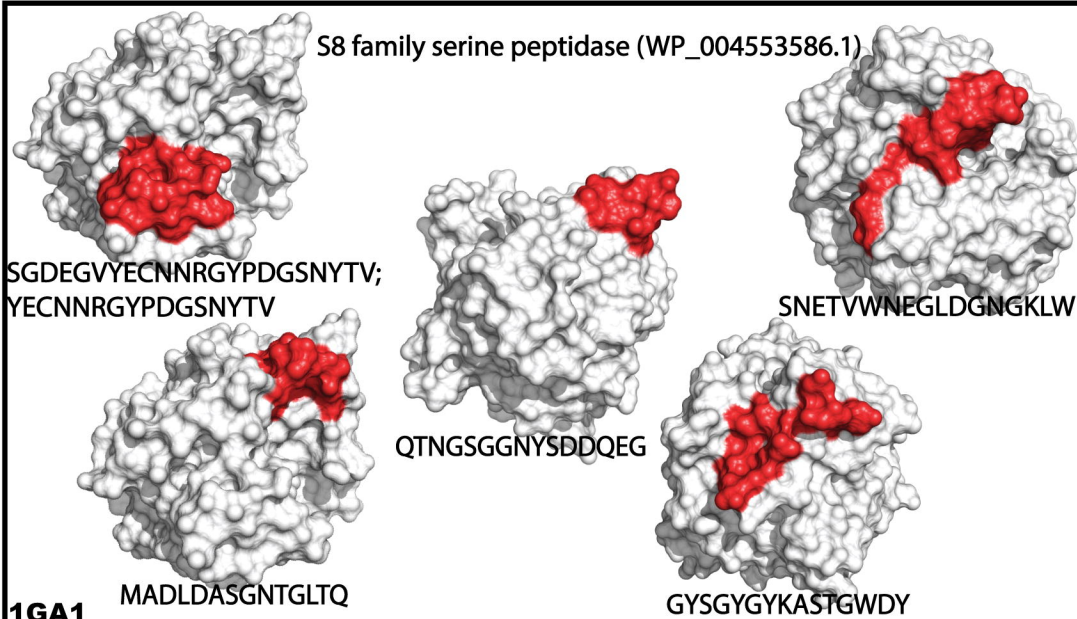

SGDEGVYECNNRGYPDGSNYTV;  
YECNNRGYPDGSNYTV

SNETVWNEGLDGNGLKW

QTNGSGGNYSDDQEG

MADLDASGNTGLTQ

GYSGYGYKASTGWDY

**1GA1**
